# Supplementary material for: Integrative Analysis Reveals the Potential Role and Prognostic Value of GOLM1 in Hepatocellular Carcinoma
Source: Hindawi journal article supplement (doi:10.1155/2022/8284500), 2022-01-01

**A**

## OS Survival Analysis of GSE54236\_Score

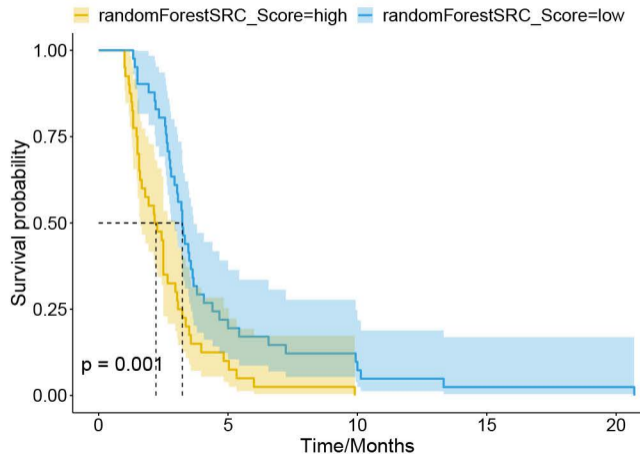**B**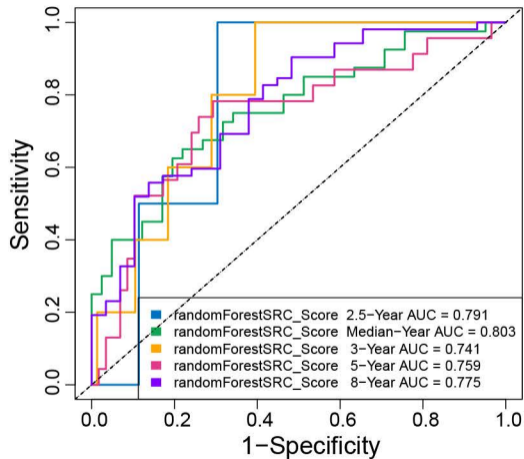

Supplement: f1 [file 8284500.f1.pdf]
